# Supplementary material for: A First-Principles Study on the Multilayer Graphene Nanosheets Anode Performance for Boron-Ion Battery
Source: MDPI journal article supplement (doi:10.3390/nano12081280), 2022-04-09
Supplement: s1 [file s1]

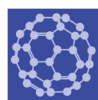

# A First-Principles Study on the Multilayer Graphene Nanosheets Anode Performance for Boron-Ion Battery

Mustapha Umar <sup>1</sup>, Chidera C. Nnadiokwe <sup>1</sup>, Muhammad Haroon <sup>1</sup>, Ismail Abdulazeez <sup>2,\*</sup>, Khalid Alhooshani <sup>1,3</sup>, Abdulaziz A. Al-Saadi <sup>1,3</sup> and Qing Peng <sup>4,5,6,\*</sup>

- <sup>1</sup> Chemistry Department, King Fahd University of Petroleum and Minerals, Dhahran 31261, Saudi Arabia; g201708770@kfupm.edu.sa (M.U.); g201707330@kfupm.edu.sa (C.C.N.); muhammad.hanif@kfupm.edu.sa (M.H.); hooshani@kfupm.edu.sa (K.A.); asaadi@kfupm.edu.sa (A.A.A.-S.)
- <sup>2</sup> Interdisciplinary Research Center for Membranes and Water Security, King Fahd University of Petroleum and Minerals, Dhahran 31261, Saudi Arabia
- <sup>3</sup> Interdisciplinary Research Center for Refining and Advanced Chemicals, King Fahd University of Petroleum and Minerals, Dhahran 31261, Saudi Arabia
- <sup>4</sup> Interdisciplinary Research Center for Hydrogen and Energy Storage, King Fahd University of Petroleum and Minerals, Dhahran 31261, Saudi Arabia
- <sup>5</sup> Physics Department, King Fahd University of Petroleum and Minerals, Dhahran 31261, Saudi Arabia
- <sup>6</sup> KACARE Energy Research and Innovation Center at Dhahran, Dhahran 31261, Saudi Arabia
- \* Correspondence: ismail.abdulazeez@kfupm.edu.sa (I.A.); qing.peng@kfupm.edu.sa (Q.P.)

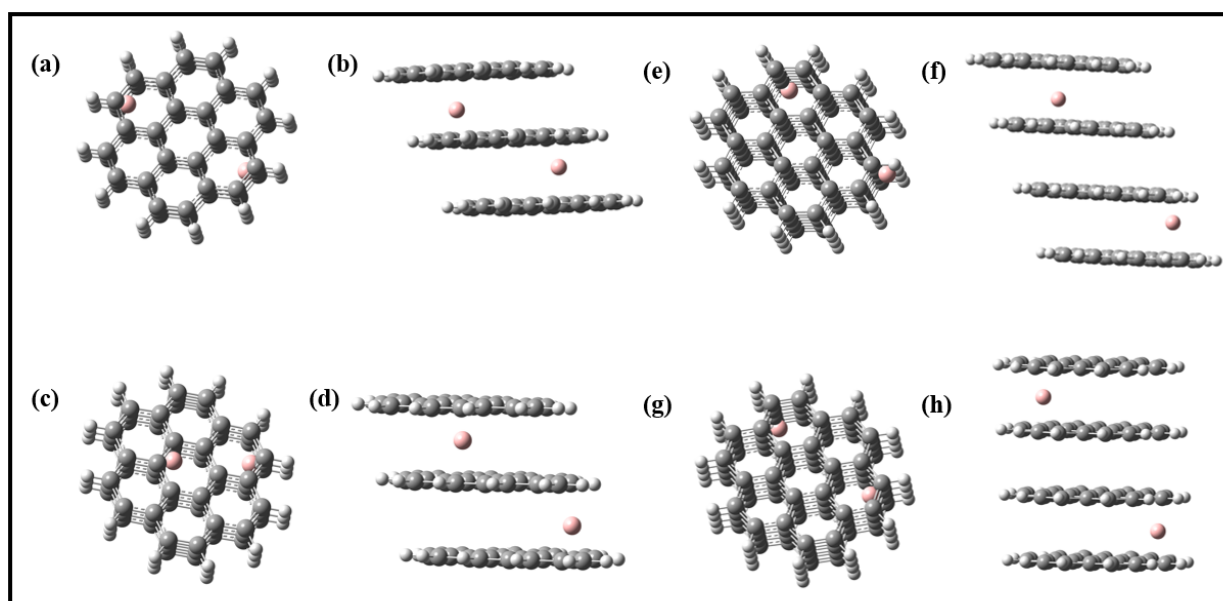

**Figure S1.** Optimized structures of (a) and (b) 2B@TG (side and topviews), (c) and (d) 2B@TG (side and topviews), (e) and (f) 2B<sup>3+</sup>@TTG (side and topviews), (g) and (h) 2B<sup>3+</sup>@TTG (side and topviews).

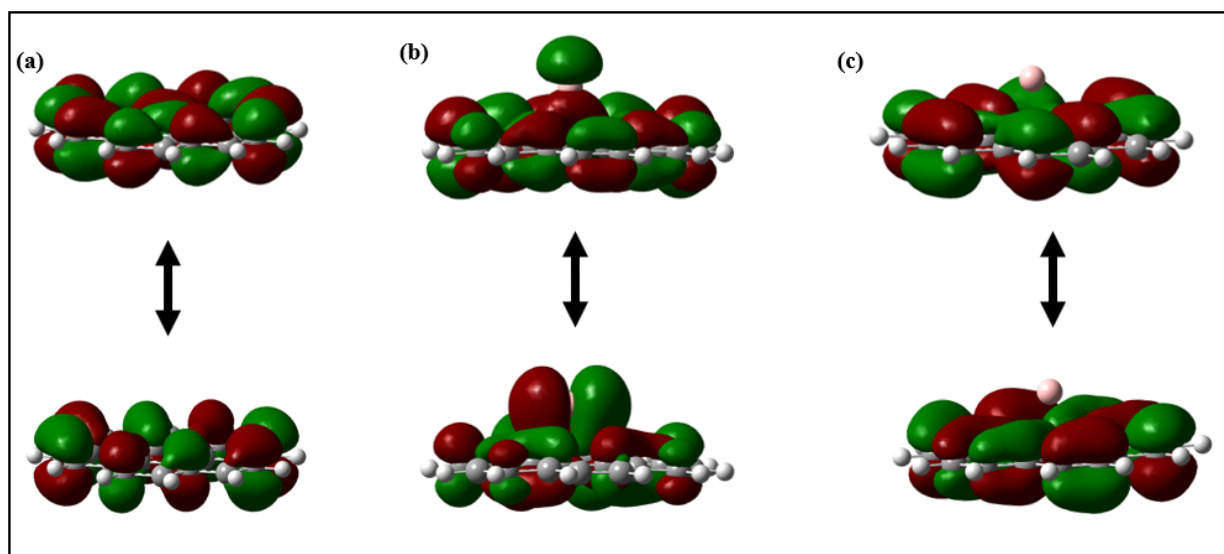

**Figure S2.** Molecular Orbital HOMO (Lower) and LUMO (upper) of (a) Monolayer Graphene Sheet (MG), (b) B@MG, (c) B<sup>3+</sup>@MG.

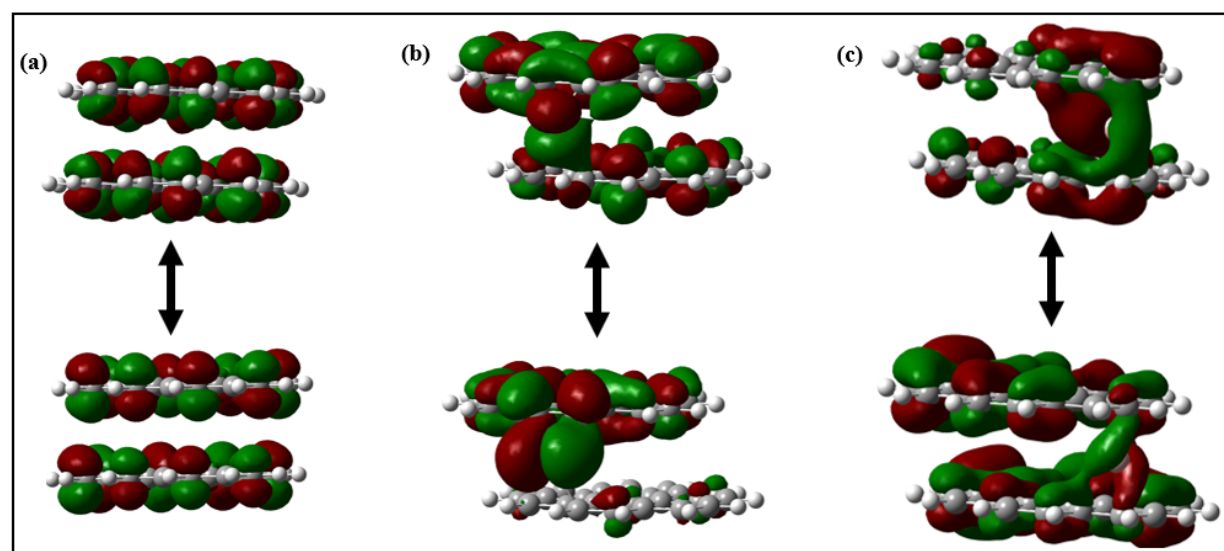

**Figure S3.** Molecular Orbital HOMO (Lower) and LUMO (upper) of (a) Bilayer Graphene Sheet (BG) (b) B@BG, (c) B<sup>3+</sup>@BG.

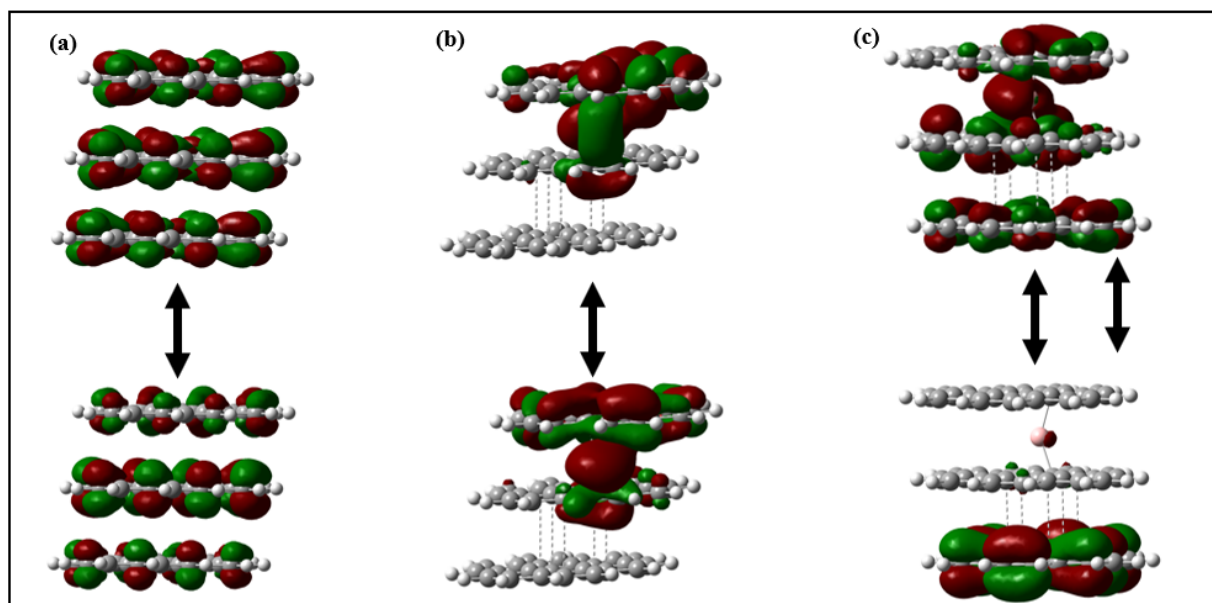

**Figure S4.** Molecular Orbital HOMO (Lower) and LUMO (upper) of (a) Trilayer Graphene Sheet (TG), (b) B@TG, (c) B<sup>3+</sup>@TG.

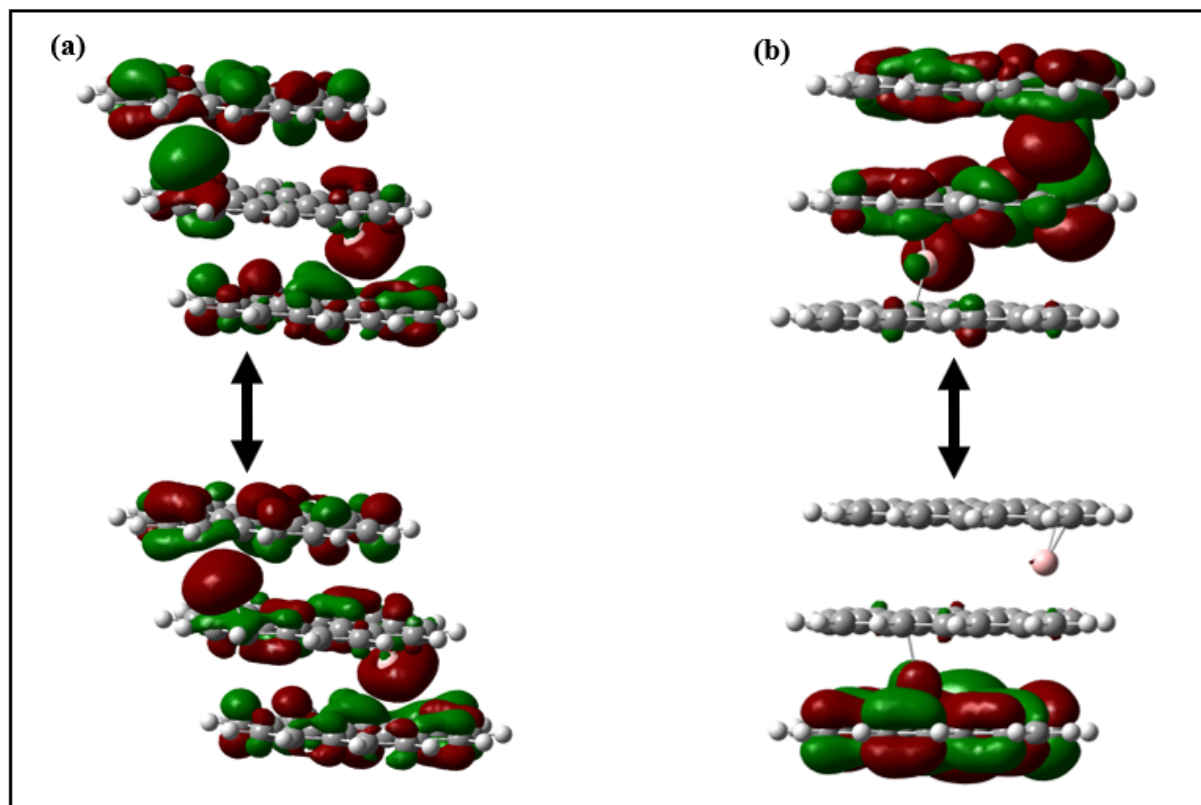

**Figure S5.** Molecular Orbital HOMO (Lower) and LUMO (upper) of (a) 2B@TG and (b) 2B<sup>3+</sup>@TG.

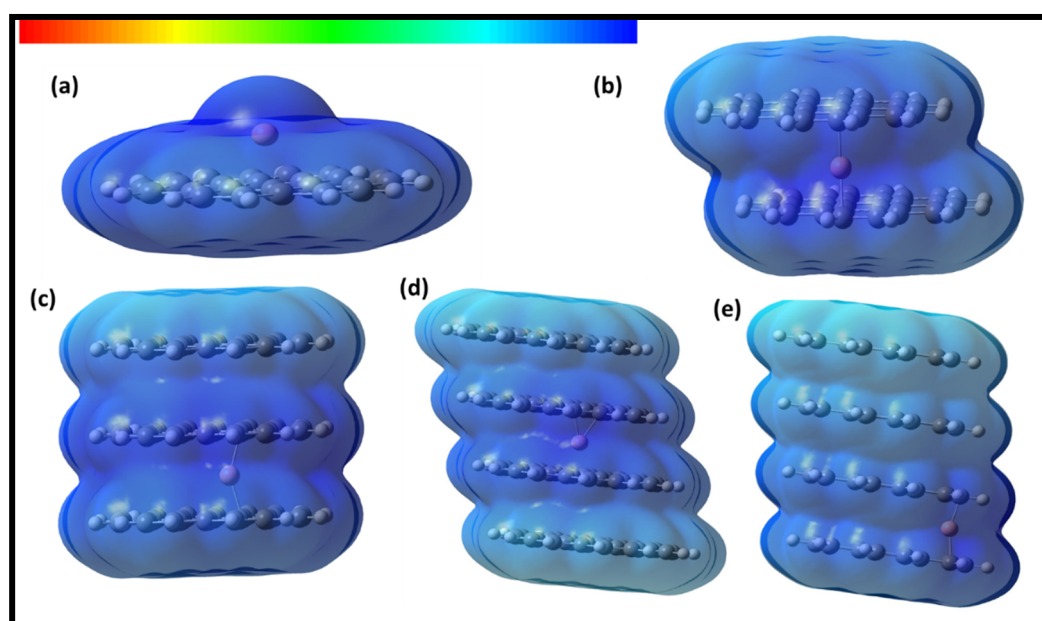

**Figure S6.** Electrostatic potential (ESP) map of (a) B<sup>3+</sup>@MG, (b) B<sup>3+</sup>@BG, (c) B<sup>3+</sup>@TG, (d) B<sup>3+</sup>@TTG\_sym and (d) B<sup>3+</sup>@TTG\_asym.

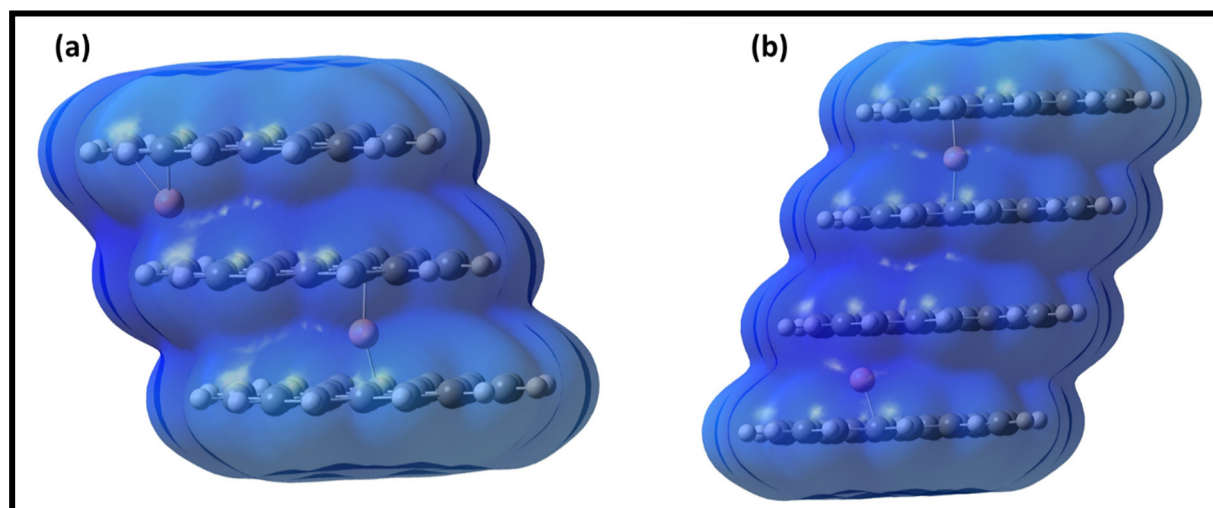

**Figure S7.** Electrostatic potential (ESP) (a) 2B<sup>3+</sup>@TG and (b) 2B<sup>3+</sup>@TTG.

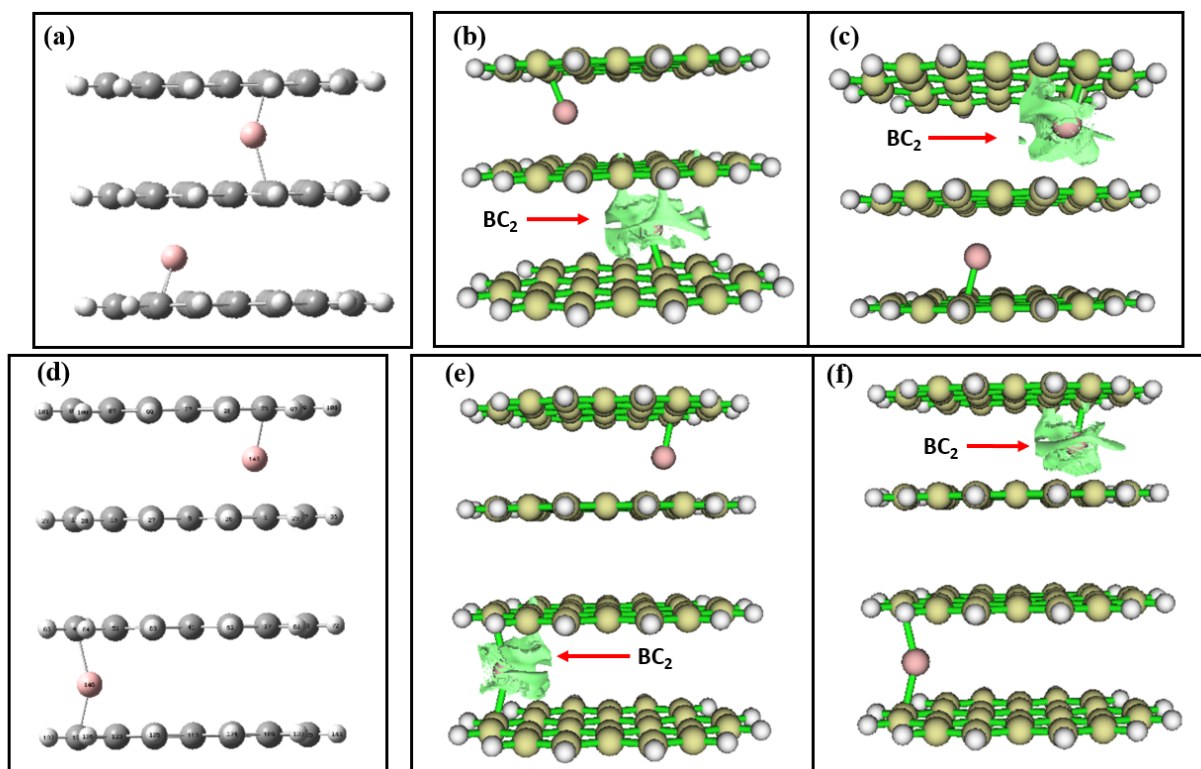

**Figure S8.** The reduced density gradient (RDG) isosurfaces analyses of (a), (b) and (c)  $2B^{3+}@TG$  (complex and RDG), and (d), (e) and (f)  $2B^{3+}@TTG$  (complex and RDG). Where blue regions correspond to strong hydrogen bonds; red regions indicate strong steric effects, whereas green regions describe strong van der Waals interactions.

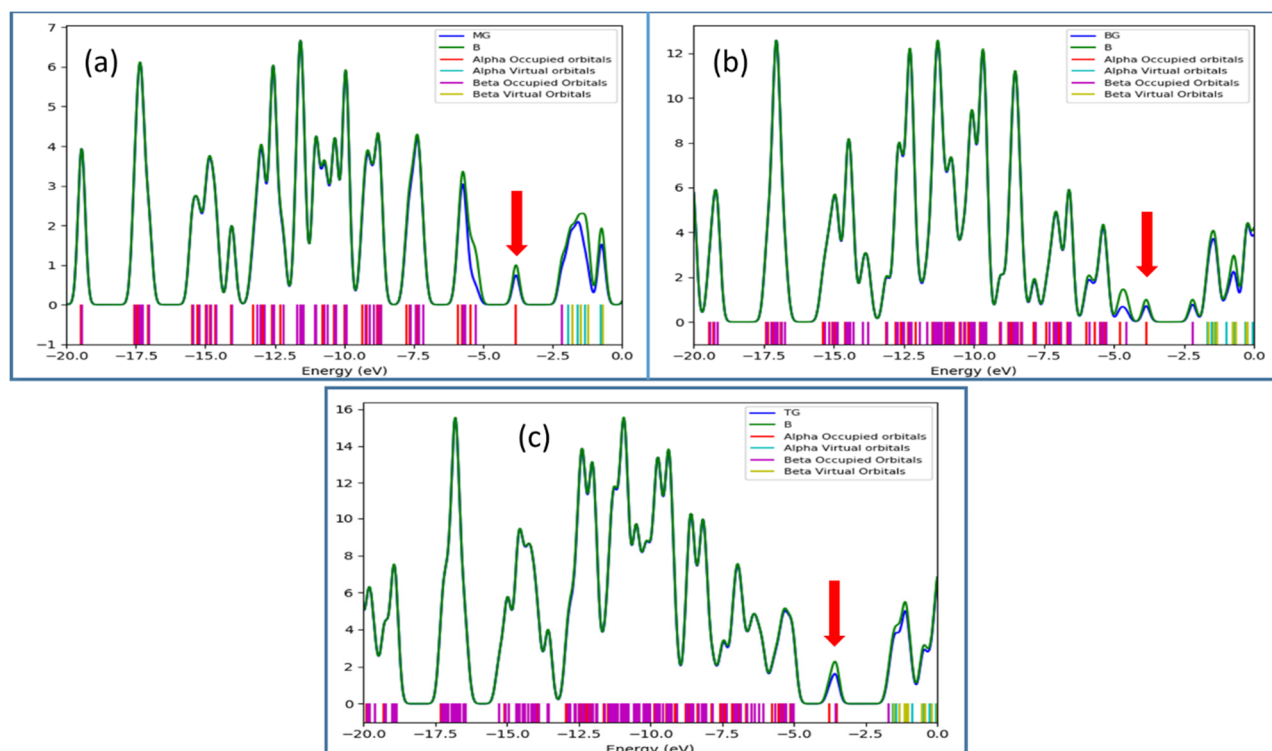

**Figure S9.** Partial density of states (PDOS) plots (a) B@MG (b) B@BG and (c) B@TG.



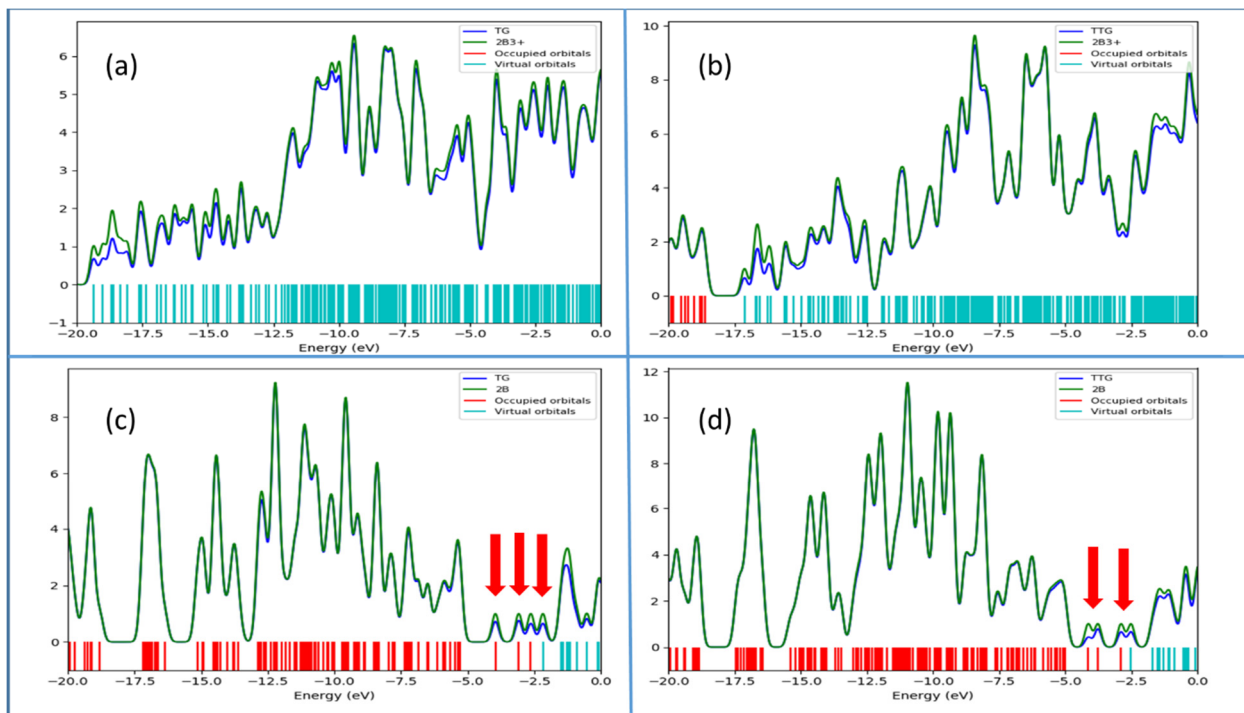

**Figure S10.** Partial density of states (PDOS) plots (a)  $2B^{3+}@TG$  (b)  $2B^{3+}@TTG$  (c)  $B@TG\_sym$  and (d)  $2B@TTG$ .

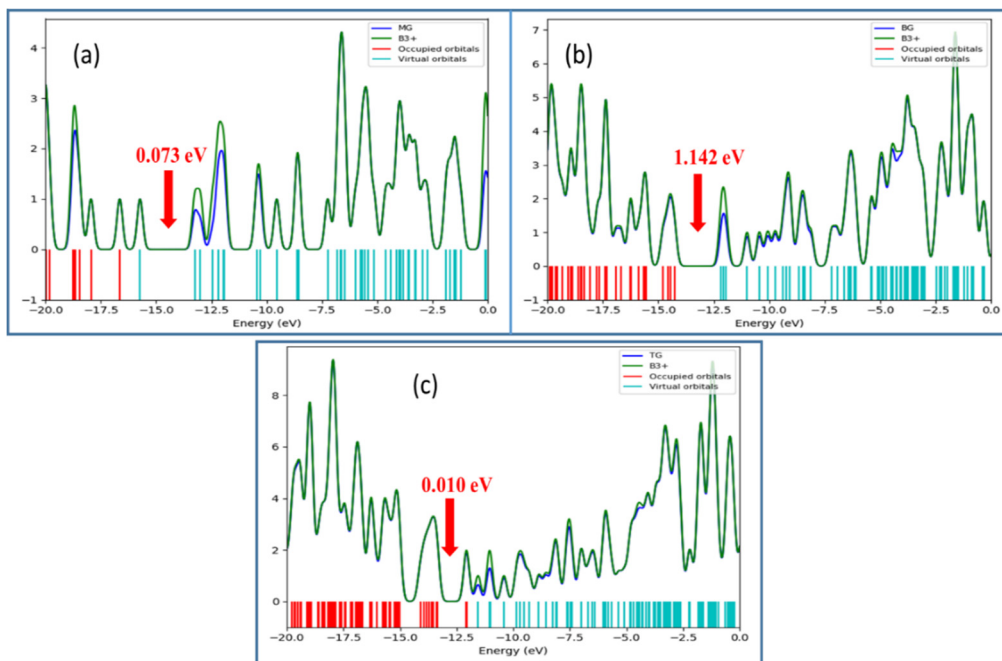

**Figure S11.** Partial density of states (PDOS) plots of (a)  $B^{3+}@MG$  (b)  $B^{3+}@BG$  and (c)  $B^{3+}@TG$ .

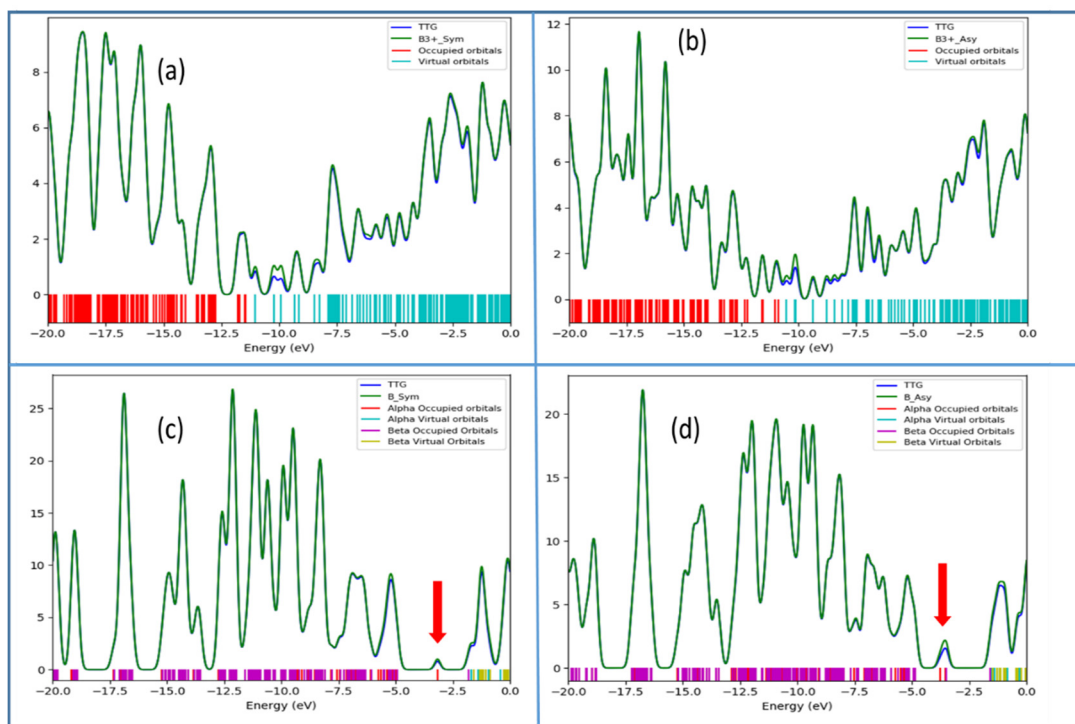

**Figure S12.** Partial density of states (PDOS) plots of (a)  $B^{3+}@TTG\_sym$  (b)  $B^{3+}@TTG\_asym$  (c)  $B@TTG\_sym$  and (d)  $B@TTG\_asym$ .

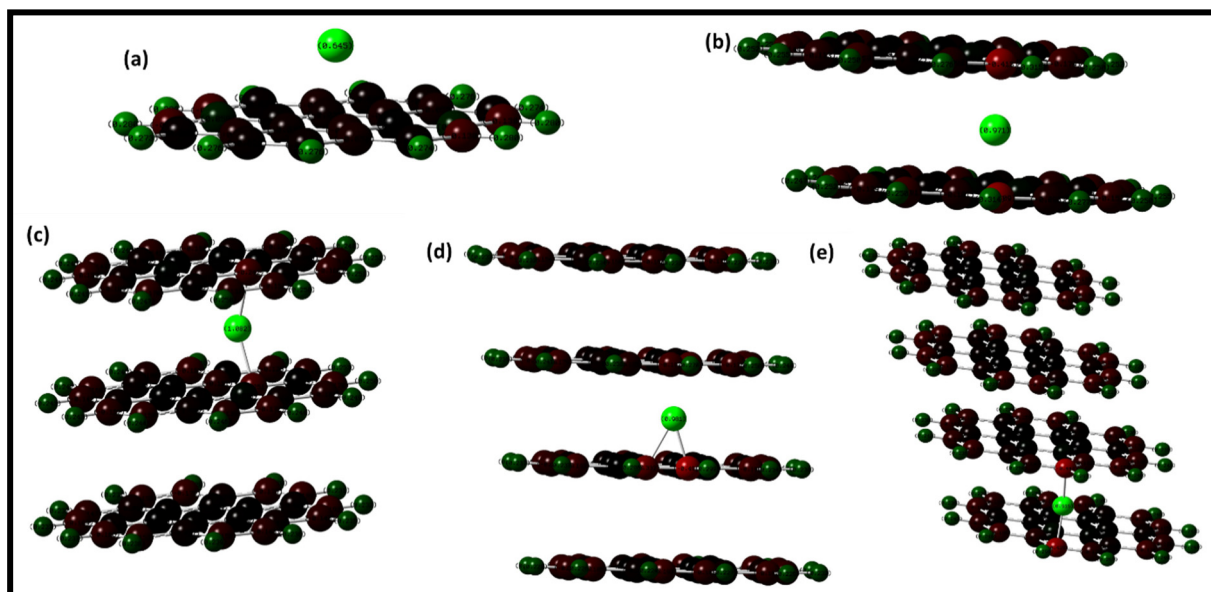

**Figure S13.** Natural bond orbital charges of (a)  $B^{3+}@MG$ , (b)  $B^{3+}@BG$  and (c)  $B^{3+}@TG$ , (d)  $B^{3+}@TTG\_sym$  and (e)  $B^{3+}@TTG\_asym$ .

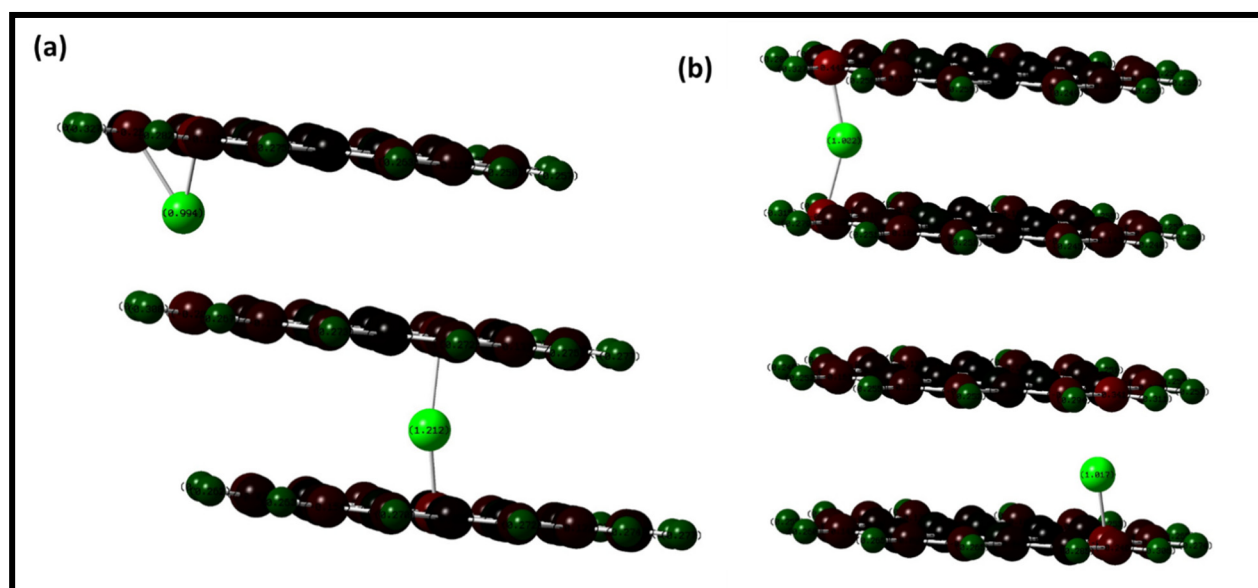

Figure S14. Natural bond orbital charges of (a)  $2B^{3+}@TG$  and (b)  $2B^{3+}@TTG$ .

Table S1. Electronic properties.

| Complexes             | $E_{HOMO}$<br>(eV) | $E_{LUMO}$<br>(eV) | $E_g$ (eV) | $\mu$<br>(eV) | $\eta$<br>(eV) | $\chi$ (eV<br>) | $E_a$<br>(eV) |
|-----------------------|--------------------|--------------------|------------|---------------|----------------|-----------------|---------------|
| MG                    | −5.085             | −2.242             | 2.843      | 13.42         | 1.421          | 3.663           | 2.242         |
| BG                    | −4.883             | −2.249             | 2.635      | 12.72         | 1.317          | 3.566           | 2.249         |
| TG                    | −4.760             | −2.233             | 2.527      | 12.23         | 1.264          | 3.496           | 2.233         |
| FGS                   | −4.622             | −2.151             | 2.472      | 11.47         | 1.236          | 3.386           | 2.151         |
| B@MG                  | −4.857             | −3.125             | 1.731      | 15.93         | 0.866          | 3.991           | 3.125         |
| $B^{3+}@MG$           | −16.31             | −16.23             | 0.073      | 264.7         | 0.036          | 16.27           | 16.23         |
| B@BG                  | −4.240             | −3.122             | 1.118      | 13.55         | 0.559          | 3.681           | 3.122         |
| $B^{3+}@BG$           | −13.98             | −12.84             | 1.142      | 179.8         | 0.571          | 13.41           | 12.84         |
| B@TG                  | −3.407             | −2.614             | 0.793      | 9.061         | 0.396          | 3.010           | 2.614         |
| $B^{3+}@TG$           | −11.96             | −11.97             | 0.010      | 143.1         | −0.005         | 11.96           | 11.97         |
| B@TTG_asym            | −3.347             | −2.507             | 0.840      | 8.567         | 0.420          | 2.927           | 2.507         |
| $B^{3+}@TTG\_asym$    | −10.85             | −10.84             | 0.010      | 117.5         | 0.005          | 10.84           | 10.84         |
| B@TTG_sym             | −4.688             | −2.680             | 2.009      | 13.57         | 1.004          | 3.684           | 2.680         |
| $B^{3+}@TTG\_sym$     | −11.28             | −11.28             | 0.003      | 127.1         | 0.002          | 11.28           | 11.28         |
| 2B@TG                 | −2.862             | −2.787             | 0.075      | 7.979         | 0.038          | 2.825           | 2.787         |
| 2B <sup>3+</sup> @TG  | −20.08             | −19.84             | 0.241      | 398.4         | 0.121          | 19.96           | 19.84         |
| 2B@TTG                | −3.099             | −3.059             | 0.040      | 9.479         | 0.020          | 3.079           | 3.059         |
| 2B <sup>3+</sup> @TTG | −18.33             | −17.66             | 0.672      | 323.9         | 0.336          | 18.0            | 17.66         |
